1 **Expression Profiling, Downstream Signaling and Subunit Interactions of**  
2 **GPA2/GPB5 in the Adult Mosquito *Aedes aegypti***

3 Short Title: Characterization of Mosquito GPA2/GPB5 Signaling

4 David A. Rocco<sup>1\*</sup> and Jean-Paul V. Paluzzi<sup>1\*</sup>

5 1. Department of Biology, York University, Toronto, Ontario, Canada, M3J1P3

6

7 \*Corresponding Author Information:

8 1. David A. Rocco

9 Department of Biology, York University, Toronto, Ontario, Canada, M3J1P3

10 (416) 301- 4843

11 davrocco@yorku.ca

12 ORCID ID: 0000-0001-9545-7713

13

14 2. Jean-Paul Paluzzi

15 Department of Biology, York University, Toronto, Ontario, Canada, M3J1P3

16 (416) 736-2100 ext. 20999

17 paluzzi@yorku.ca

18 ORCID ID: 0000-0002-7761-0590

19

20 Keywords: GPA2/GPB5, Glycoprotein hormone, Leucine-rich repeat-containing G protein

21 coupled-receptor 1, Homodimer, Heterodimer, Mosquito

## 22 **Abstract**

23 GPA2/GPB5 and its receptor constitute a glycoprotein hormone-signalling system native to the  
24 genomes of most vertebrate and invertebrate organisms, including humans and mosquitoes.  
25 Unlike the well-studied gonadotropins and thyrotropin, the exact function of GPA2/GPB5 is  
26 unclear, and whether it elicits its functions as heterodimers, homodimers or as independent  
27 monomers remains unknown. Here, the glycoprotein hormone signalling system was investigated  
28 in adult mosquitoes, where GPA2 and GPB5 subunit transcripts co-localized to bilateral pairs of  
29 neuroendocrine cells within the first five abdominal ganglia of the central nervous system.  
30 Unlike human GPA2/GPB5 that demonstrated strong heterodimerization between subunits, the  
31 GPA2/GPB5 subunits in *A. aegypti* lacked evidence of heterodimerization when heterologously  
32 expressed. Interestingly, cross-linking analysis to determine subunit interactions revealed *A.*  
33 *aegypti* and *H. sapiens* GPA2 and GPB5 subunits form homodimers, and treatments with  
34 independent subunits did not activate *A. aegypti* LGR1 or *H. sapiens* TSH receptor, respectively.  
35 Since mosquito GPA2/GPB5 heterodimers were not evident by heterologous expression of  
36 independent subunits, a tethered construct was generated for expression of the subunits as a  
37 single polypeptide chain to improve heterodimer formation. Our findings revealed *A. aegypti*  
38 LGR1 elicited constitutive activity that elevated levels of cAMP as determined by increased  
39 cAMP-dependent luminescence. However, upon treatment with recombinant tethered  
40 GPA2/GPB5 heterodimers, an inhibitory G protein (Gi) signalling cascade is initiated and  
41 forskolin-induced cAMP production is inhibited. These results provide evidence towards the  
42 functional deorphanization of LGR1 and, moreover, further support the notion that GPA2/GPB5  
43 heterodimerization is a requirement for glycoprotein hormone receptor activation.

## 44 **Introduction**

45           Members of the cystine knot growth factor (CKGF) superfamily, which are characterized  
46 with a CKGF domain as their primary structural feature, include (i) the glycoprotein hormones,  
47 (ii) the invertebrate bursicon hormone, (iii) the transforming growth factor beta (TGF $\beta$ ) family,  
48 (iv) the bone morphogenetic protein (BMP) antagonist family, (v) the platelet-derived growth  
49 factor (PDGF) family and (vi) the nerve growth factor (NGF) family. Of the members of the  
50 CKGF superfamily, the glycoprotein hormones are of fundamental importance in the regulation  
51 of both vertebrate and invertebrate physiology.

52           In vertebrates, members of the glycoprotein hormone family include follicle-stimulating  
53 hormone (FSH), luteinizing hormone (LH), thyroid-stimulating hormone (TSH) as well as  
54 chorionic gonadotropin (CG), which are implicated in governing several aspects of physiology  
55 including reproduction, energy metabolism along with growth and development. Structurally,  
56 these hormones are formed by the heterodimerization of two cystine-knot glycoprotein subunits,  
57 an  $\alpha$  subunit that is structurally identical for each hormone (GPA1), and a hormone-specific  $\beta$   
58 subunit (GPB1-4) <sup>1,2</sup>.

59           Two novel glycoprotein hormone subunits were identified in the human genome,  
60 glycoprotein  $\alpha$ 2 (GPA2) and glycoprotein  $\beta$ 5 (GPB5), and were found to heterodimerize  
61 (GPA2/GPB5) and act on the same receptor as TSH. As a result, GPA2/GPB5 was coined the  
62 name thyrostimulin to differentiate it from TSH in vertebrates <sup>3,4</sup>. Unlike other glycoprotein  
63 hormones which are restricted to the vertebrate lineage, homologous genes encoding  
64 GPA2/GPB5 subunits exist in all bilaterian organisms, where its function appears to be  
65 pleiotropic <sup>3-5</sup>. In vertebrates, the function of GPA2/GPB5 has been implicated, or at least

66 suggested, to be involved in reproduction <sup>6</sup>, thyroxine production <sup>3,7</sup>, skeletal development <sup>8</sup>,  
67 immunoregulation <sup>9,10</sup> and the proliferation of ovarian cancer cell lines <sup>11</sup>. For invertebrate  
68 species, GPA2/GPB5 has been implicated or demonstrated to function in development <sup>12-15</sup>,  
69 hydromineral balance <sup>13-18</sup> as well as in reproduction <sup>18,19</sup>.

70 Non-covalent interactions and heterodimerization between the subunits forming FSH,  
71 LH, TSH and CG is required for their respective biological functions <sup>1,20</sup>. However, whether  
72 heterodimerization is required for GPA2/GPB5 to activate its receptor and exert its physiological  
73 role in vertebrates and invertebrates is debated. For FSH, LH, TSH and CG, the subunits are co-  
74 expressed in the same cells and each hormone is released into circulation as heterodimers <sup>21,22</sup>.  
75 On the other hand, GPA2 and GPB5 subunit expression profiles, both for vertebrate and  
76 invertebrate organisms, do not always occur in the same cells, and GPA2 is often expressed more  
77 widely and abundantly than GPB5 in some tissues <sup>7,12,23-25</sup>. Additionally, unlike the beta subunits  
78 of the classic glycoprotein hormones, the structure of the GPB5 subunit lacks an extra pair of  
79 cysteine residues that form an additional disulfide linkage, referred to as the ‘seatbelt’, which  
80 strengthens and stabilizes its heterodimeric association with GPA2 <sup>26</sup>.

81 Relative to other G protein-coupled receptors (GPCRs), members of the leucine-rich  
82 repeat-containing G protein-coupled receptor (LGR) family are often characterized with a large  
83 extracellular amino terminal domain responsible for the selective binding of their large hormone  
84 ligands <sup>27</sup>. Following its initial genomic and molecular characterization <sup>28</sup>, an invertebrate  
85 receptor for GPA2/GPB5, called LGR1, was functionally deorphanized in the fruit fly  
86 *Drosophila melanogaster*, where GPA2/GPB5 heterodimers were found to activate LGR1 and  
87 increased intracellular levels of cyclic AMP (cAMP) <sup>29</sup>. Interestingly, stimulatory G protein (Gs)

88 coupling and signalling to elevate cAMP was also shown with GPA2/GPB5-TSH receptor  
89 activation in humans<sup>3,6</sup>.

90 In the mosquito *Aedes aegypti*, genes encoding for GPA2, GPB5 and LGR1 were  
91 identified and shown to be expressed in all developmental life stages, with expression enriched  
92 in adults compared to juvenile stages<sup>14</sup>. In adults, LGR1 was found localized to epithelia  
93 throughout the gut where GPA2/GPB5 could regulate feeding-related processes and  
94 hydromineral balance<sup>18</sup>. Notably, LGR1 transcript expression was also observed in the  
95 reproductive organs of males and females<sup>19</sup>. In adult male mosquitoes, knockdown of LGR1  
96 expression led to abnormal spermatogenesis with spermatozoa displaying malformations such as  
97 shortened flagella and consequently, LGR1-knockdown males had 60% less spermatozoa as well  
98 as significantly reduced fecundity relative to control mosquitoes<sup>19</sup>.

99 With an interest in better understanding GPA2/GPB5 signalling in *A. aegypti* mosquitoes,  
100 our work herein set out to characterize the tissue-specific and cellular distribution expression  
101 profile of GPA2/GPB5 in mosquitoes. As well, we sought to determine GPA2/GPB5 interactions  
102 and demonstrate GPA2/GPB5-LGR1 functional coupling using a heterologous system.  
103 Combining various molecular techniques, we demonstrate GPA2/GPB5 cellular co-expression in  
104 the central nervous system of adult mosquitoes, and that heterodimers are indeed required to  
105 activate LGR1, which exhibits ligand-dependent G protein-coupling activity. Moreover, these  
106 results provide evidence for human and mosquito GPA2 and GPB5 homodimers, which were  
107 incapable of activating TSH receptor or LGR1, respectively. Overall, these findings appreciably  
108 advance our understanding of GPA2/GPB5 signalling in mosquitoes and provide novel  
109 directions to uncover the functions of homologous systems in other organisms.

110

111

## 112 **Results**

### 113 ***A. aegypti* GPA2 and GPB5 subunit expression localization**

114 To determine the distribution of GPA2 and GPB5 subunit expression in the central  
115 nervous system and peripheral tissues, adult mosquito organs were analyzed using RT-qPCR.  
116 GPA2 and GPB5 subunit transcript was detected in the central nervous system of adult male and  
117 female mosquitoes, with significantly enriched expression in the abdominal ganglia relative to  
118 other nervous and peripheral tissues (Fig. 1a, b). Fluorescence *in situ* hybridization was  
119 employed to localize cell-specific expression of the GPA2 and GPB5 transcripts in the  
120 abdominal ganglia. GPA2 and GPB5 anti-sense RNA probes identified two bilateral pairs of  
121 neuroendocrine cells (Fig. 1c, d) within each of the first five abdominal ganglia in male and  
122 female mosquitoes whereas the control sense probes did not detect cells in the nervous system  
123 (Fig. 1e, f). Within each of these first five abdominal ganglia, GPA2 transcript localized to  
124 similar laterally-positioned cells as the GPB5 transcript (Fig. 1g, h). To determine if cells  
125 expressing GPA2 transcript were the same cells expressing GPB5 transcript, abdominal ganglia  
126 were simultaneously treated with both GPA2 and GPB5 anti-sense RNA probes. Using this dual  
127 probe approach, results confirmed the detection of only two bilateral pairs of cells (Fig. 1i, j) that  
128 displayed a greater staining intensity compared to the intensity of cells detected when using  
129 either the GPA2 or GPB5 anti-sense probe alone (Fig. 1c, d).

130 Using a custom antibody targeting *A. aegypti* GPB5, we next sought to immunolocalize  
131 GPB5 protein in the abdominal ganglia. GPB5 immunoreactivity localized to two bilateral pairs  
132 of cells (Fig. 2a) within the first five ganglia, which were in similar positions to cells expressing  
133 GPA2 and GPB5 transcript (Fig. 1c, d, g-j). In some preparations, three bilateral pairs of cells

134 immunolocalized to the first five abdominal ganglia of the ventral nerve cord (Fig. 2b), however  
135 no cells were ever detected in the sixth terminal ganglion (Fig. 2c). Along the lateral sides of  
136 each of the first five abdominal ganglia, GPB5 immunoreactive processes were observed to  
137 interconnect and closely associate as a tract of axons emanating through the lateral nerve (Fig.  
138 2b). Control treatments with GPB5 antibody preabsorbed with the GPB5 immunogenic antigen,  
139 failed to detect any cells in ganglia (Fig. 2d)

140

#### 141 **Cross-linking analyses to determine *A. aegypti* GPA2/GPB5 dimerization patterns**

142 *A. aegypti* GPA2 and GPB5 subunit protein interactions were studied using western blots  
143 of recombinant proteins from HEK 293T cells expressing each subunit independently, or co-  
144 expressing both subunits in the same cells using a dual promoter plasmid. Under control  
145 conditions, GPA2 protein is represented as two bands at 16 kDa and 13 kDa, which correspond  
146 to the glycosylated and non-glycosylated forms of *A. aegypti* GPA2, respectively (Fig. 3a).  
147 Following deglycosylation with PNGase, the higher molecular weight band of GPA2 is  
148 eliminated, and the non-glycosylated lower molecular weight band intensifies (Fig. 3a).  
149 Interestingly, when the GPA2 subunit was tested to examine potential homodimerization, an  
150 additional strong band at ~32 kDa was detected, which migrates to ~30 kDa when cross-linked  
151 protein samples were deglycosylated using PNGase (Fig. 3a). Under control conditions, GPB5  
152 protein is represented as a band size at 24 kDa and the migration pattern is not affected by  
153 PNGase treatment (Fig. 3b). Upon treatment with DSS, a faint second band appears at 48 kDa,  
154 which does not change in molecular weight following treatment with PNGase (Fig. 3b). Three  
155 independent band sizes at 24 kDa (GPB5), 16 kDa (glycosylated GPA2) and 13 kDa (non-



156 glycosylated GPA2) were detected in lanes loaded with protein isolated from HEK 293T cells  
157 co-expressing GPA2 and GPB5 subunits (Fig. 3c). After removing N-linked sugars, the 24 kDa  
158 band is not affected but the 16 kDa band disappears and 13 kDa band intensifies (Fig. 3c), as  
159 observed when assessing the GPA2 subunit independently (Fig. 3a). Cross-linked samples show  
160 the addition of two higher molecular weight bands at ~48 kDa and ~32 kDa, the latter of which  
161 migrates lower to ~30 kDa when subjected to PNGase treatment (Fig. 3c). Given the resolution  
162 and intensity of the detected bands, molecular weight bands at ~48 kDa and ~32 kDa could  
163 indicate GPA2/ GPB5 heterodimeric interactions (13 or 16 kDa + 24 kDa = 37-40 kDa).  
164 Alternatively, these bands could reflect GPA2 (13 or 16 kDa + 13 or 16 kDa = 26-32 kDa) and  
165 GPB5 (24 + 24kDa = 48 kDa) homodimers. As a result, to clarify whether *A. aegypti* GPA2 and  
166 GPB5 subunits are heterodimeric partners, additional experiments were performed.

167

### 168 **Heterodimerization of mosquito and human GPA2/ GPB5**

169 Using yeast two-hybrid analyses and cross-linking experiments, it was previously shown  
170 that human GPA2 (hGPA2) and GPB5 (hGPB5) subunits are capable of heterodimerization<sup>3</sup>. As  
171 a result, to verify whether *A. aegypti* GPA2 and GPB5 subunit proteins are heterodimeric  
172 candidates, experiments were first performed alongside hGPA2/hGPB5 subunit proteins, using  
173 the latter as an experimental control.

174 Initially, single-promoter expression constructs were designed to incorporate a FLAG-tag  
175 and His-tag on the C-terminus of (human and mosquito) GPA2 and GPB5 subunits, respectively  
176 (i.e. GPA2-FLAG and GPB5-His). When probed with an anti-His antibody, no bands were  
177 detected in lanes containing only GPA2-FLAG (human and mosquito) protein (Fig. 4a, b).

178 Similarly, no bands were detected when an anti-FLAG antibody was used to detect GPB5-His  
179 protein (human and mosquito) (Fig. 4a, b). Lanes loaded with cross-linked human GPB5-His  
180 protein revealed two bands at 18 kDa (monomer) and 36 kDa (homodimer) (Fig. 4a). Similarly,  
181 in lanes loaded with cross-linked human GPA2-FLAG protein, two bands at 20 kDa (monomer)  
182 and 40 kDa (homodimer) were detected (Fig. 4a). To determine subunit heterodimerization,  
183 GPA2-FLAG protein was combined with GPB5-His protein (i.e. produced separately in different  
184 cell batches) and subsequently crosslinked. Results showed an intense 38 kDa band size that  
185 correlated to the molecular weight of the hGPA2-FLAG/hGPB5-His heterodimers; detected with  
186 both anti-His and anti-FLAG primary antibody solutions (Fig. 4a).

187 The same experiments were replicated using *A. aegypti* GPA2-FLAG/ GPB5-His protein  
188 but using three-fold higher concentration of DSS cross-linker to help improve detection of inter-  
189 subunit interactions. Results demonstrated that lanes loaded with DSS-treated GPB5-His protein  
190 resulted in a 24 kDa monomer band (Fig. 4b), whereas lanes containing cross-linked GPA2-  
191 FLAG detected a 16 kDa (glycosylated monomer), 30 kDa and 32 kDa (homodimers) band size  
192 (Fig. 4b). As a result, unlike immunoblots containing hGPA2-FLAG and hGPB5-His protein  
193 (Fig. 4a), lanes loaded with cross-linked *A. aegypti* GPA2-FLAG and GPB5-His failed to  
194 provide evidence of bands correlating to the predicted molecular weight of an *A. aegypti*  
195 GPA2/GPB5 heterodimer, which would be expected at 37-40 kDa (Fig. 4b).

196

### 197 ***A. aegypti* GPA2/GPB5 unable to activate LGR1-mediated Gs and Gi/o signalling pathways**

198 Bioluminescent assays were employed to confirm LGR1 interaction with mosquito GPA2  
199 and/or GPB5 subunits and elucidate downstream signalling pathways upon receptor activation.

200 Since human GPA2/GPB5 has previously been shown to bind and activate human thyrotropin  
201 receptor (hTSHR) mediating a stimulatory G protein (Gs) signalling pathway<sup>3</sup>, our experimental  
202 design was first tested using hGPA2/GPB5 and hTSHR as a positive control. Recombinant  
203 hGPA2 and hGPB5 subunit proteins were produced in HEK 293T cells with single promoter  
204 expression constructs containing the hGPA2 or hGPB5 sequences. Conditioned culture media  
205 containing secreted proteins were subsequently concentrated, and crude extracts containing  
206 hGPA2, hGPB5 or a combination of hGPA2 and hGPB5 subunits were tested as ligands on HEK  
207 293T cells expressing the hTSHR and a mutant luciferase biosensor, which produces  
208 bioluminescence upon interacting with cAMP. Control treatments involved the incubation of  
209 hTSHR/ luciferase-expressing cells with concentrated media collected from mCherry-transfected  
210 cells (negative control), or 250 nM forskolin (positive control) (Fig. 5a, b). Our findings indicate  
211 that incubation with extracts containing a combination of both hGPA2 and hGPB5 were required  
212 to stimulate a cAMP-mediated luminescent response from hTSHR-expressing cells, but not when  
213 incubated with extracts containing individual subunits (Fig. 5a). We next performed parallel  
214 experiments using *A. aegypti* GPA2/GPB5 and LGR1. Given the availability of a dual promoter  
215 plasmid (pBud-CE), an additional treatment was performed whereby GPA2/GPB5 subunits were  
216 co-expressed within the same cells and conditioned media was concentrated as above. Unlike  
217 hGPA2/hGPB5 subunit homologs (Fig. 5a), no combination of mosquito GPA2 and/or GPB5  
218 subunit proteins led to an increase in the luminescent response (Fig. 5b).

219 Using an *in silico* analysis to predict coupling specificity of *A. aegypti* LGR1 and human  
220 TSHR to different families of G-proteins<sup>30</sup>, we determined that *A. aegypti* LGR1 is strongly  
221 predicted to couple to inhibitory (Gi) G proteins (Table S3). As a result, to determine whether *A.*

222 *aegypti* GPA2 and/or GPB5 activate a Gi/o signalling pathway, various combinations of GPA2  
223 and GPB5 were tested for their ability to inhibit a forskolin-induced rise in cAMP measured by  
224 changes in bioluminescence (Fig. 5c, d). Results revealed that sole treatments of GPA2 and  
225 GPB5 proteins alone significantly inhibited a forskolin-induced luminescent response, relative to  
226 control treatments with mCherry proteins, when incubated with cells expressing LGR1 (Fig. 5c).  
227 However, similar inhibitory effects of GPA2 and GPB5 proteins were also observed with cells  
228 not expressing LGR1 (Fig. 5d).

### 229 **Characterization of a tethered *A. aegypti* GPA2/GPB5 heterodimer**

230       Activation of hTSHR was only observed when both human GPA2 and GPB5 subunits  
231 were coapplied for receptor binding (Fig. 5a) and, unlike the heterodimerization of human  
232 GPA2/GPB5 observed in our experiments, mosquito GPA2/GPB5 lacked evidence of  
233 heterodimerization (Fig. 4). In light of these observations, it was hypothesized that the activation  
234 of *A. aegypti* LGR1 also required subunit heterodimerization. To produce stable GPA2/GPB5  
235 heterodimers using the heterologous expression system, both GPA2 and GPB5 mosquito  
236 subunits were expressed as a tethered, single-chain polypeptide by fusing the C-terminus of the  
237 GPB5 prepropeptide sequence with the N-terminus of the GPA2 propeptide sequence using a  
238 tagged linker sequence composed of twelve amino acids, involving three glycine-serine repeats  
239 and six histidine residues.

240       HEK 293T cells were transfected to transiently express a single promoter plasmid  
241 construct containing the tethered GPA2/GPB5 sequence, or the red fluorescent protein  
242 (mCherry) as a negative control. At 48-hrs post-transfection, cell lysates along with the  
243 conditioned culture media, the latter of which contains secreted proteins, were collected for

244 immunoblot analysis. No bands were detected in lanes containing cell lysate or secreted protein  
245 fractions of mCherry transfected cells (Fig. 6a). However, a strong band was detected at 32-40  
246 kDa in the lysates of cells transfected to express tethered GPA2/GPB5 (Fig. 6a). Moreover, two  
247 bands were detected at 37 kDa and 40 kDa in lanes loaded with secreted fractions of tethered  
248 GPA2/GPB5-transfected cells, that matched the predicted molecular weights of *A. aegypti*  
249 GPA2/GPB5 heterodimers corresponding to either non-glycosylated (13 kDa) or glycosylated  
250 (16 kDa) GPA2 plus GPB5 (24 kDa) producing bands of 37 kDa or 40 kDa, respectively (Fig.  
251 6a). After secreted protein extracts containing tethered GPA2/GPB5 proteins were treated with  
252 PNGase, the higher 40 kDa molecular weight band disappears and the 37 kDa band size  
253 intensifies, which confirms the observed molecular weight shift results from removal of N-linked  
254 oligosaccharides (Fig. 6b).

255

### 256 ***A. aegypti* GPA2/GPB5 heterodimers activate LGR1**

257 The effects of tethered GPA2/GPB5 heterodimers on LGR1 activity was examined. Cell  
258 lysates or secreted protein fractions collected from mCherry- or tethered GPA2/GPB5-  
259 transfected cells were incubated with HEK 293T cells co-expressing the cAMP luciferase  
260 biosensor and either *A. aegypti* LGR1 or mCherry (i.e. not expressing LGR1). Whether tethered  
261 GPA2/GPB5 proteins could elevate cAMP or inhibit a forskolin-induced rise in cAMP was  
262 assessed and compared to control treatments with proteins harvested from mCherry-transfected  
263 cells. Overall, the relative luminescent response was significantly greater in LGR1-transfected  
264 cells compared to mCherry-transfected cells (Fig. 7). Unlike treatments with forskolin that  
265 significantly increased cAMP-mediated luminescence, neither secreted protein fractions nor cell

266 lysates of tethered GPA2/GPB5-transfected cells elicited an increase in the cAMP-mediated  
267 luminescent response relative to controls (Fig. 7a, b). Secreted protein fractions containing  
268 tethered GPA2/GPB5 protein had no effect on the forskolin-induced cAMP-mediated  
269 luminescence, compared to control treatments with mCherry secreted proteins in LGR1-  
270 expressing cells (Fig. 7c). Notably, however, treatments of LGR1-transfected cells, but not  
271 mCherry-transfected cells or assay media, with cell lysates containing tethered GPA2/GPB5  
272 protein significantly inhibited the forskolin-induced rise in cAMP relative to treatments with  
273 mCherry-transfected cell lysates (Fig. 7d).

274

275

## 276 **Discussion**

### 277 **Co-expression of *A. aegypti* GPA2/GPB5 in neuroendocrine cells of the abdominal ganglia**

278 The central nervous system (CNS) of adult mosquitoes is comprised of a brain and a  
279 ventral nerve cord, consisting of three fused thoracic ganglia and six abdominal ganglia. Our  
280 findings demonstrate that the GPA2 and GPB5 transcripts are significantly enriched in the  
281 abdominal ganglia of adult mosquitoes relative to peripheral tissues and other regions of the  
282 CNS, with no sex-specific differences. Although low levels of GPA2 and GPB5 transcripts were  
283 detected in the thoracic ganglia and brain using RT-qPCR, fluorescence *in situ* hybridization  
284 (FISH) techniques used to localize GPA2 and GPB5 transcripts, along with  
285 immunohistochemical detection of GPB5, did not identify specific cells in these regions of the  
286 nervous system. Instead, GPA2 and GPB5 transcripts, as well as GPB5 immunoreactivity was  
287 identified in 2-3 laterally-localized bilateral pairs of neuroendocrine cells within the first five

288 abdominal ganglia. These findings are consistent with previous findings in the fruit fly  
289 *Drosophila melanogaster*, where GPA2 and GPB5 subunit transcripts were localized to four  
290 bilateral pairs of neuroendocrine cells in the fused ventral nerve cord, that were distinct from  
291 cells expressing other neuropeptides including leucokinin, bursicon, crustacean cardioactive  
292 peptide or calcitonin-like diuretic hormone <sup>16</sup>.

293 Both FISH and immunohistochemical techniques revealed GPA2 and GPB5 expression  
294 within two bilateral pairs of neuroendocrine cells, that were positioned slightly posterior to  
295 where the lateral nerves emanate. In some abdominal ganglia preparations, a third bilateral pair of  
296 cells immunoreactive for GPB5 protein was detected; however these additional cells were not  
297 detected using FISH, which suggests GPB5 transcript may be differentially regulated between  
298 different bilateral pairs of cells. Given that the same number of cells were observed to express  
299 GPA2 transcript, and these cells localized to similar positions as GPB5 expressing cells, GPA2  
300 and GPB5 were believed to be co-expressed in the same cells. To verify cellular co-expression of  
301 GPA2/GPB5, abdominal ganglia were simultaneously treated with both GPA2- and GPB5-  
302 targeted anti-sense RNA probes. From this analysis, again only two bilateral pairs of cells were  
303 detected and these were more intensely stained compared to preparations treated with either probe  
304 alone, which confirms that GPA2 and GPB5 are indeed co-expressed within the same  
305 neurosecretory cells of the first five abdominal ganglia in adult mosquitoes. The cellular co-  
306 expression of GPA2 and GPB5 proteins implies that, upon a given stimulus, both subunits are  
307 regulated in a similar manner and are likely simultaneously released following the appropriate  
308 stimulus. Importantly, since co-expression and heterodimerization of the classic vertebrate

309 glycoprotein hormone subunits takes place within the same cells<sup>21,22</sup>, these findings indicate that  
310 the mosquito GPA2/GPB5 subunits may be produced and released as heterodimers *in vivo*.

311

### 312 **Heterodimerization and Homodimerization of GPA2/GPB5**

313 To study the interactions of *A. aegypti* GPA2 and GPB5 subunits *in vitro*, hexa-histidine  
314 tagged proteins secreted into the culture media of transfected HEK 293T cells were collected and  
315 analysed under denaturing conditions after cross-linker treatments, which had been utilized  
316 previously to show GPA2/GPB5 heterodimerization in other organisms<sup>3,6,29</sup>. Cross-linked  
317 protein samples were then deglycosylated to identify whether the removal of N-linked sugars  
318 affected dimerization. Treatment of mosquito GPA2 and GPB5 subunits individually with cross-  
319 linker resulted in the detection of bands with sizes corresponding to homodimers of GPA2 (~32  
320 kDa) and GPB5 (48 kDa). GPA2 homodimer bands migrated lower to ~30 kDa following  
321 deglycosylation treatment with PNGase. However, experiments performed with cross-linked  
322 GPA2/GPB5 protein were not able to confirm heterodimerization since the detected band sizes  
323 could also reflect GPA2 and GPB5 homodimeric interactions. Previous cross-linking studies that  
324 demonstrated GPA2/GPB5 heterodimerization in human<sup>3,6</sup> and fruit fly<sup>29</sup> did not provide  
325 evidence on the interactions of each subunit alone to determine if homodimerization is possible.  
326 In these earlier studies, molecular weight band sizes that were identified as heterodimers could  
327 have been the result of homodimeric interactions<sup>3,6,29</sup>. As a result, the findings herein with  
328 mosquito GPA2/GPB5 indicate additional experiments are required to confirm GPA2/GPB5  
329 heterodimerization in these organisms.



330 To clarify whether *A. aegypti* (mosquito) GPA2/GPB5 heterodimerize, each subunit was  
331 differentially tagged (GPA2-FLAG and GPB5-His), and immunoblots containing various  
332 combinations of cross-linked subunits were probed with either anti-FLAG or anti-His antibody.  
333 As a positive control, experiments were first performed using *H. sapiens* (human) GPA2/GPB5  
334 subunit proteins. Similar to mosquito GPA2 and GPB5 subunits, results showed human GPA2  
335 and GPB5 subunits are capable of homodimerization. To study heterodimeric interactions, GPA2  
336 and GPB5 subunit proteins were expressed separately in HEK 293T cells. Upon combining and  
337 treating protein samples with DSS, a molecular weight band size at 38 kDa, corresponding to the  
338 molecular weight of GPA2/GPB5 heterodimers (human GPA2-FLAG/ GPB5-His), was detected  
339 and migrated differently than bands corresponding to GPA2 (40 kDa) and GPB5 (36 kDa)  
340 homodimers. Taken together, our results confirm human GPA2 and GPB5 is indeed capable of  
341 heterodimerization *in vitro*. Further, an induction of cAMP was observed when both subunits  
342 were present for TSHR functional activation, whereas treatments with individual subunits failed  
343 to significantly increase cAMP-mediated luminescence. As a result, human GPA2/GPB5 is  
344 capable of heterodimerization, and since a combination of both subunits were required to signal a  
345 TSHR-mediated elevation in cAMP, these heterodimers are required to functionally activate its  
346 cognate glycoprotein hormone receptor (TSHR).

347 The classic glycoprotein hormones, which include FSH, LH, TSH and CG, are formed by  
348 a common alpha subunit non-covalently linked to a hormone-specific beta subunit. Each subunit  
349 is co-expressed and assembled as a heterodimer in the endoplasmic reticulum within cells before  
350 being secreted as heterodimer into circulation <sup>21</sup>. Heterodimerization is required for secretion and  
351 receptor binding activity of each hormone <sup>1,31,32</sup>. Our results confirm human GPA2/GPB5

352 heterodimerizes, as detected following chemical cross-linking treatments and, even without  
353 cross-linking, both subunits are required to activate TSHR. In our experimental approach, human  
354 GPA2 and GPB5 subunits were not co-expressed within the same cells using a dual promoter  
355 expression construct. Rather, subunits were separately expressed by different batches of cells and  
356 mixed post harvesting of conditioned media to demonstrate heterodimerization and TSHR  
357 activation. Thus, unlike FSH, TSH, CG, and LH<sup>1</sup>, our results provide novel information that  
358 demonstrate co-expression is not necessarily required for heterodimerization of human  
359 GPA2/GPB5 *in vitro*.

360 Analogous experiments using the same concentration of DSS cross-linker (data not  
361 shown) as well as three-fold higher concentrations were performed with mosquito GPA2-FLAG  
362 and GPB5-His subunit proteins. Irrespective of the DSS concentration used, no bands  
363 corresponding to the expected molecular weights of GPA2/GPB5 heterodimers (37-40 kDa)  
364 were observed, but rather, only GPA2 and GPB5 homodimers were detected (Fig. 4b). The  
365 inability of mosquito GPA2 and GPB5 subunits to successfully heterodimerize could result from  
366 improper protein folding of insect-derived secretory proteins in HEK 293T cells used for  
367 heterologous expression. As a result, future experiments should test the heterologous expression  
368 and heterodimerization of *A. aegypti* GPA2/GPB5 in insect cell lines that could provide a more  
369 appropriate environment for tertiary and quaternary protein structure formation.

370 Mosquito GPA2/GPB5 (each subunit alone, mixed from different cell batches or co-  
371 expressed in the same cells using a dual promoter vector) was incapable of stimulating a cAMP-  
372 mediated luminescent response in HEK 293T cells expressing LGR1. Since we identified *A.*  
373 *aegypti* LGR1 is predicted to couple a Gi/o signalling pathway (Table S3), we next examined if

374 mosquito GPA2/GPB5 could inhibit a forskolin-induced cAMP response. Sole treatments of  
375 GPA2 and GPB5 subunit proteins inhibited a forskolin-induced rise in cAMP, however these  
376 inhibitory actions were not owed to G protein signalling events related to *A. aegypti* LGR1, since  
377 inhibition was observed in control cell lines in the absence of LGR1. These results suggest  
378 mosquito GPA2 and GPB5 subunit proteins may non-specifically interact with other  
379 endogenously expressed proteins, like the orphan glycoprotein hormone receptors LGR4 and  
380 LGR5 that are highly expressed in HEK 293T cells<sup>33</sup>.

381

382 ***A. aegypti* GPA2/ GPB5 heterodimers activate LGR1 and initiate a switch from Gs to Gi**  
383 **coupling**

384 Activation of the human thyrotropin receptor was only observed when both human GPA2  
385 and GPB5 subunits were present which, unlike data obtained involving mosquito subunits,  
386 demonstrated human GPA2/GPB5 subunit heterodimerization *in vitro* using the mammalian  
387 heterologous system. Nonetheless, given the observed co-localization of the subunits within  
388 bilateral pairs of cells in the first five abdominal ganglia in *A. aegypti*, which is comparable to  
389 cellular colocalization shown earlier in *D. melanogaster*<sup>16</sup>, we proposed that *A. aegypti*  
390 GPA2/GPB5 heterodimers would be required to functionally activate LGR1 *in vitro*. To confirm  
391 this possibility, a tethered construct was designed linking the C-terminus of GPB5 to the N-  
392 terminus of GPA2 using a histidine tagged glycine/serine-rich linker sequence. Natural and  
393 synthetic linkers function as spacers that connect multidomain proteins, and are commonly used  
394 to study unstable or weak protein-protein interactions<sup>34</sup>. The incorporation of a linker sequence  
395 between glycoprotein hormone subunits has been performed previously, and does not affect the

396 assembly, secretion or bioactivity of human FSH<sup>35</sup>, TSH<sup>36</sup> and CG<sup>37</sup>. The conversion of two  
397 independent glycoprotein hormone subunits into a single polypeptide chain using a glycine-  
398 serine repeat linker sequence has also been performed recently with lamprey GPA2/GPB5<sup>38</sup>,  
399 which was shown to induce a cAMP response. Interestingly, similar proteins involving TSH  
400 alpha fused to TSH beta with carboxyl-terminal peptide (CTP) as a linker promoted a three-fold  
401 higher induction of cAMP compared to wild-type TSH, likely because the addition of a CTP  
402 linker increases protein stability and flexibility<sup>39</sup>.

403 Thus, tethered *A. aegypti* GPA2/GPB5 was expressed in HEK 293T cells and cell lysates  
404 and secreted protein fractions were collected for expression studies. Immunoblot studies revealed  
405 the detection of a strong 32-40 kDa band in lanes loaded with cell lysate proteins, and two less  
406 intense distinct bands at 40 kDa and 37 kDa in secreted protein fractions of GPA2/GPB5-  
407 transfected cells. Molecular weight band sizes at 40 kDa and 37 kDa in secreted protein fractions  
408 matched the expected band sizes of tethered GPA2/GPB5 heterodimers, corresponding to  
409 nonglycosylated 13 kDa or glycosylated 16 kDa GPA2 plus 24 kDa GPB5. Moreover, treatments  
410 with PNGase verified the tethered GPA2/GPB5 proteins are glycosylated, as observed for GPA2  
411 expressed independantly in earlier experiments herein and in previous studies<sup>14</sup>. Highly intense  
412 bands in cell lysates indicate the retention of immature and mature GPA2/GPB5 heterodimers.  
413 For this reason, cell lysates and secreted protein fractions of tethered GPA2/GPB5-expressing  
414 cells were individually tested for their ability to activate *A. aegypti* LGR1.

415 In humans, GPA2/GPB5-TSHR signalling stimulates adenylyl cyclase activity to increase  
416 intracellular cAMP via interaction with a Gs protein<sup>3,6,11</sup>, and these results were confirmed in  
417 our studies. Comparatively, GPA2/GPB5 signalling was also shown to increase levels of cAMP

418 upon binding LGR1 in *D. melanogaster*<sup>29</sup>. Interestingly, our experiments demonstrate low level  
419 constitutive activity of adenylyl cyclase in LGR1 expressing cells since cAMP luminescent  
420 response was moderately greater in LGR1-transfected cells compared to cells not expressing  
421 LGR1. Constitutive activity of glycoprotein hormone receptors is well known and has been  
422 demonstrated to be stronger for the thyrotropin receptor than for the LH/CG receptor<sup>40</sup>.  
423 Surprisingly, our experiments indicate that incubations of LGR1-expressing cells with  
424 GPA2/GPB5 tethered heterodimers triggers a switch from low level constitutive Gs coupling to  
425 Gi coupling for *A. aegypti* LGR1, given that GPA2/GPB5 heterodimers significantly inhibited the  
426 forskolin-induced increase in cAMP in LGR1-transfected cells but not in cells lacking LGR1  
427 expression. This finding, while highly interesting, is not entirely unusual since promiscuous G  
428 protein coupling has been reported for glycoprotein hormone receptors like the TSH receptor (Gs  
429 and Gq) and LH/CG (Gi and Gs)<sup>41-43</sup>.

430

### 431 **Regulation by GPA2/GPB5 heterodimers**

432 To help stabilize heterodimerization, the beta subunit sequences of the classic  
433 glycoprotein hormones (FSH, LH, TSH and CG) contain two additional cysteine residues that  
434 form an additional disulfide bridge which wraps around and “buckles” the alpha subunit<sup>26</sup>.  
435 Though heterodimerization can occur with mutated forms of this “seatbelt” structure, there is a  
436 dramatic decrease in heterodimer stability<sup>21,22</sup>. GPB5 in vertebrates and invertebrates lack the  
437 seatbelt structure required to stabilize heterodimerization<sup>26</sup>. Thus, the hypothesis that GPA2/  
438 GPB5 functions as a heterodimer in a physiological situation (i.e. without chemical cross-  
439 linking) is challenged. The dissociation constant (Kd) associated with heterodimerization of the

440 classic glycoproteins hormone subunits and GPA2/GPB5 is  $10^{-7}$  M to  $10^{-6}$  M, which indicates  
441 heterodimeric interactions are favoured at these concentrations<sup>44,45</sup>. However, since the classic  
442 beta subunits contain an additional disulfide bridge that strengthens its association with the  
443 common alpha subunit, heterodimeric interactions are stabilized in circulation at physiological  
444 concentrations as low as  $10^{-11}$  M to  $10^{-9}$  M<sup>22</sup>. Without this seatbelt structure, GPA2/GPB5  
445 heterodimeric interactions are possible only at micromolar concentrations, which are not  
446 typically observed in circulation<sup>22,26</sup>. Together, the limited evidence so far using heterologous  
447 expression challenges the possibility of endocrine regulation by GPA2/GPB5 heterodimers.  
448 Nonetheless, it was argued in *D. melanogaster* that the large neurosecretory cells co-expressing  
449 the glycoprotein hormone subunits, along with their corresponding axonal projections that  
450 localized distinctly from organs that express the GPA2/GPB5 receptor (LGR1), did support that  
451 this system is indeed endocrine in nature<sup>16</sup>. Alternatively, the subunits could function  
452 independently or regulate physiology as a heterodimer in a paracrine/ autocrine fashion. In rats,  
453 GPA2/GPB5 is expressed in oocytes and may act as a paracrine regulator of TSHR-expressed  
454 granulosa cells in the ovary to regulate reproductive processes<sup>6</sup>. Another possibility to consider  
455 is that additional endogenous co-factors may be involved, but remain unidentified, which help to  
456 strengthen interaction between the GPA2 and GPB5 subunits, since the tethered mosquito  
457 GPA2/GPB5 was indeed capable of activating LGR1 *in vitro* inducing a Gi signalling cascade.

#### 458 **GPA2 and GPB5 homodimerization**

459 Our results establish that human and mosquito GPA2 and GPB5 subunits can weakly and  
460 strongly, respectively, homodimerize. However, whether these homodimers, pertain to a  
461 physiological function *in vivo* is unknown. Treatments of either mosquito or human GPA2 and

462 GPB5 subunits alone did not stimulate specific downstream signalling in LGR1 or TSHR-  
463 expressing cells, indicating that only GPA2/GPB5 heterodimers can activate their cognate  
464 glycoprotein hormone receptors. However, it is possible that GPA2 and GPB5 homodimers may  
465 target other unidentified receptors. In insects, the moulting hormone bursicon is a heterodimer of  
466 two subunits called burs and pburs. Burs/pburs heterodimers act via a glycoprotein hormone  
467 receptor (i.e. LGR2) to regulate processes such as tanning and sclerotization of the insect cuticle  
468 as well as wing inflation after adult emergence<sup>46</sup>. Recently, it was demonstrated that bursicon  
469 subunits can homodimerize (i.e. burs/burs and pburs/pburs) and these homodimers mediate  
470 actions independently of LGR2 to regulate immune responses in *A. aegypti* and *D. melanogaster*  
471<sup>47,48</sup>.

472 In addition to the human/ mosquito GPA2/GPB5 homodimers observed in our studies,  
473 human GPA2 was also shown to interact with the beta subunits of CG and FSH<sup>3</sup>. Lastly, the  
474 expression patterns of GPA2 and GPB5 in a number of organisms do not always strictly co-  
475 localize, since GPA2 expression exhibits a much wider distribution and is expressed more  
476 abundantly than GPB5 in a number of vertebrate and invertebrate organisms<sup>7,12,23,24,49,50</sup>. Taken  
477 together, this raises the possibility that GPA2 and GPB5 subunits may interact with other  
478 unknown proteins that could activate different receptors or signalling pathways and elicit distinct  
479 functions.

#### 480 **Concluding remarks**

481 Although much is known about the classic vertebrate glycoprotein hormones including  
482 LH, FSH, TSH and CG along with their associated receptors, little progress has been made thus  
483 far towards better understanding the function of GPA2/GPB5, signalling and subunit

484 interactions, particularly for the invertebrate organisms. To our knowledge, this is the first study  
485 to demonstrate *A. aegypti* and *H. sapiens* GPA2 and GPB5 subunit homodimerization *in vitro*.  
486 Our results also confirm that heterodimerization of *A. aegypti* and *H. sapiens* GPA2/GPB5 are  
487 required for the activation of their cognate receptors LGR1 and TSHR, respectively. Unlike  
488 previous reports showing GPA2/GPB5-induced LGR1 activation elevates intracellular cAMP by  
489 coupling a Gs pathway, the current findings provide novel information supporting that *A. aegypti*  
490 LGR1 couples to a Gi protein to inhibit cAMP levels following application of heterodimeric  
491 GPA2/GPB5. Further, our results revealed that mosquito LGR1 is constitutively active when  
492 overexpressed in the absence of its ligand, GPA2/GPB5, inducing a Gs signalling pathway that  
493 raises levels of cAMP levels, which is consistent with previous observations with overexpression  
494 of fruit fly LGR1<sup>29, 51</sup> as well as mammals including dog and human TSH receptor<sup>52, 53</sup>.

495 In the mosquito nervous system, GPA2 and GPB5 subunits are co-expressed within the  
496 the same neurosecretory cells of the first five abdominal ganglia where their coordinated release  
497 and regulation are likely. As a result, whether GPA2/GPB5 are secreted as heterodimers, like the  
498 classic glycoprotein hormones, and/or as homodimers remains to be determined *in vivo*;  
499 however, these results confirm GPA2 and GPB5 homodimers do not activate LGR1 and TSHR.  
500 Whether these homodimers are functional *in vivo* and what physiological role they play (if any)  
501 is a research direction that should be addressed in future studies. All in all, this investigation has  
502 provided novel information for an invertebrate GPA2/GPB5 and LGR1 signalling system and  
503 contributes towards advancing our understanding and the functional elucidation of this ancient  
504 glycoprotein hormone signalling system common to nearly all bilaterian organisms.

505



506 **Acknowledgements**

507 Research in this study was supported by a Natural Sciences and Engineering Research Council of  
508 Canada (NSERC) Discovery Grant and Ontario Ministry of Research & Innovation Early  
509 Researcher Award to JPP.

510

511 **Materials and methods**

512 **Animals**

513 Adult *Aedes aegypti* (Liverpool) were derived from an established laboratory-reared  
514 colony raised under conditions described previously<sup>18</sup>.

515

516 **GPA2/ GPB5 transcript analysis by RT-qPCR**

517 Total RNA was isolated and purified from select *A. aegypti* tissues and organs, reverse  
518 transcribed into cDNA. GPA2 and GPB5 transcript abundance was quantified using a  
519 StepOnePlus<sup>TM</sup> Real-Time PCR System (Applied Biosystems) as described previously<sup>55</sup> (see SI  
520 Materials and Methods for details). GPA2 and GPB5 transcript abundance was normalized to the  
521 expression of two reference genes following the  $\Delta\Delta C_t$  method as previously described<sup>14</sup>.  
522 Experiments were repeated using a total of three technical replicates per sample and three  
523 biological replicates for each tissue/ organ.

524

525 **Fluorescence in situ hybridization**

526 Using gene-specific primers (Table S1), *A. aegypti* GPA2 and GPB5 sequences were  
527 amplified from previously prepared constructs<sup>14</sup> that contained the GPA2 and GPB5 complete

528 open reading frames (ORFs). Sense and antisense probes were then generated following a similar  
529 protocol as recently reported<sup>19</sup>. Briefly, cDNA fragments were ligated to pGEM T Easy vector  
530 (Promega, Madison, WI, USA) and used to transform NEB 5- $\alpha$  competent *Escherichia coli* cells  
531 (New England Biolabs, Whitby, ON, Canada). After screening plasmid constructs for  
532 directionality using T7 promoter oligonucleotide and gene-specific primers (Table S1), template  
533 sense or anti-sense cDNA strands for GPA2 and GPB5 probe synthesis were created by PCR  
534 amplification and verified by Sanger sequencing for base accuracy (The Centre for Applied  
535 Genomics, Sick Kids Hospital, Toronto, ON, Canada). Digoxigenin (DIG)-labelled anti-sense  
536 and sense RNA probes corresponding to GPA2 and GPB5 subunits were synthesized using the  
537 HiScribe T7 High Yield RNA Synthesis kit (New England Biolabs, Whitby, ON, Canada).  
538 Fluorescence *in situ* hybridization (FISH) was then used to detect GPA2 and/or GPB5 transcript  
539 in the mosquito central nervous system using 4 ng  $\mu\text{l}^{-1}$  (GPB5) and/or 6 ng  $\mu\text{l}^{-1}$  (GPA2) RNA  
540 sense/ antisense probes, following a previously established protocol<sup>54</sup>. Preparations were  
541 analyzed with a Lumen Dynamics X-Cite<sup>TM</sup> 120Q Nikon fluorescence microscope (Nikon,  
542 Mississauga, ON, Canada), or a Yokogawa CSU-XI Zeiss Cell Observer Spinning Disk confocal  
543 microscope, and images were processed using Zeiss Zen and ImageJ software. All microscope  
544 settings were kept identical when acquiring images of control and experimental preparations.

545

#### 546 **Wholemout immunohistochemistry**

547 GPB5 immunoreactivity in the abdominal ganglia of adult mosquitoes was examined in  
548 newly emerged and four-day old *A. aegypti* that were lightly CO<sub>2</sub> anesthetized, and dissected in  
549 PBS at RT. Tissues were fixed, permeabilized and incubated in a custom rabbit polyclonal GPB5

550 antibody ( $1 \mu\text{g ml}^{-1}$ ) designed against an antigen sequence (CDSNEISDWRFP) positioned at  
551 residues 69-80<sup>14</sup> for 48 h at 4°C rocking. Control treatments involved pre-incubated *A. aegypti*  
552 GPB5 primary antibody solution containing 100:1 peptide antigen:antibody (mol:mol). After  
553 several washes, tissues were incubated overnight at 4°C in Alexa Fluor 488-conjugated goat anti-  
554 rabbit Ab (1:200) secondary antibody (Life Technologies) in PBS containing 10% normal sheep  
555 serum. The next day, samples were washed and then mounted onto coverslips using mounting  
556 media containing Diamidino-2-phenylindole dihydrochloride (DAPI), and analyzed using a  
557 Lumen Dynamics X-Cite™ 120Q Nikon fluorescence microscope (Nikon, Mississauga, ON,  
558 Canada), or optically sectioned using a Yokogawa CSU-XI Zeiss Cell Observer Spinning Disk  
559 confocal microscope. All images were processed using Zeiss Zen and ImageJ software. Further  
560 details concerning the wholemount immunohistochemical protocol were reported in an earlier  
561 study<sup>18</sup>.

562

### 563 **Plasmid expression constructs**

564 Plasmid expression constructs were designed to study *A. aegypti* and *H. sapiens*  
565 GPA2/GPB5 subunit dimerization patterns and receptor signalling. Using previously available  
566 hexa-histidine-tagged *A. aegypti* GPA2-His<sup>14</sup>, as well as FLAG (DYKDDDDK)-tagged (-  
567 FLAG) *H. sapiens* GPB5-FLAG (Genscript, Clone OHu31847D) plasmid vectors as template,  
568 the full ORF of each (*A. aegypti* and *H. sapiens*) GPA2 and GPB5 subunit coding sequence,  
569 including a consensus Kozak translation initiation sequence, was amplified and a hexa-histidine  
570 or FLAG tag sequence was incorporated on the carboxyl-terminus of subunits to produce the  
571 following fusion proteins; *A. aegypti* GPA2-FLAG, *H. sapiens* GPB5-His (Table S2). A

572 pcDNA3.1<sup>+</sup> mammalian expression construct containing mCherry, which was a gift from Scott  
573 Gradia (Addgene plasmid # 30125), was utilized to verify cell transfection efficiency.  
574 Experiments also utilized previously prepared pcDNA3.1<sup>+</sup> constructs with *A. aegypti* GPB5-His  
575 and *A. aegypti* LGR1 coding sequences and dual promoter vector pBudCE4.1 containing both *A.*  
576 *aegypti* GPA2-His and GPB5-His<sup>55</sup>. Additionally, pcDNA 3.1<sup>+</sup> mammalian expression vector  
577 construct containing FLAG tagged *H. sapiens* thyrotropin receptor (TSHR-FLAG) (Genscript  
578 USA Inc., Clone OHu18318D), *H. sapiens* GPA2-FLAG (Genscript USA Inc., Clone  
579 OHu31847D), *H. sapiens* GPB5-FLAG (Genscript USA Inc., Clone OHu55827D) and  
580 pGlosensor<sup>TM</sup>-22F cyclic adenosine monophosphate (cAMP) biosensor plasmid (Promega  
581 Corp., Madison, WI), which were used for receptor activation and intracellular signalling assays.

582

### 583 **Generation of tethered *A. aegypti* GPA2/GPB5 construct**

584 The ORFs of *A. aegypti* GPA2 and GPB5 sequences were tethered together in order to  
585 promote heterodimer interactions for testing in receptor activity assays with mammalian cell  
586 lines. A hexa-histidine tagged artificial linker sequence involving three glycine-serine repeats  
587 was used to fuse the amino-terminus of *A. aegypti* GPA2 propeptide sequence to the carboxyl-  
588 terminus of *A. aegypti* GPB5 prepropeptide sequence, using multiple PCR amplifications with  
589 several primer sets (Table S2) as performed previously using lamprey GPA2 and GPB5  
590 sequences<sup>38</sup> (see SI Materials and Methods for details).

591

### 592 **Transient transfection of HEK 293T cells**

593 Human embryonic kidney (HEK 293T) cells were grown in complete growth media  
594 (Dulbecco's modified eagles medium: nutrient F12 (DMEM) media, 10% heat inactivated fetal  
595 bovine serum (Wisent, St. Bruno, QC) and 1X antimycotic-antibiotic) and maintained in a water-  
596 jacketed incubator at 37°C, 5% CO<sub>2</sub>. When cells reached ~80-90% confluency, they were  
597 transfected with plasmid expression constructs in 6-well tissue culture plates (Thermo Fisher  
598 Scientific, Burlington, ON) using Lipofectamine 3000 transfection reagent (Life Technologies,  
599 Carlsbad, CA) with 3:1 (μL:μg) transfection reagent to DNA ratio. Before transfection, culture  
600 media was replaced with either serum-free medium (DMEM and 1X antimycotic-antibiotic) for  
601 experiments that collected secreted proteins, or fresh complete growth medium for experiments  
602 that dually-transfected cells with pGlosensor<sup>TM</sup>-22F cAMP biosensor plasmid and either *H.*  
603 *sapiens* TSHR, *A. aegypti* LGR1, or mCherry.

604

### 605 **Preparation of protein samples**

606 At 48 h post-transfection, serum-free culture media containing secreted proteins were  
607 collected and concentrated in 0.5 mL 3-kDa molecular weight cut-off centrifugal filters (VWR  
608 North America). In some experiments, cells were dislodged with PBS containing 5 mM  
609 ethylenediaminetetraacetic acid (EDTA; Life Technologies) (PBS-EDTA) pH 8.0, pelleted at  
610 400xg for 5 min, resuspended in PBS and transferred to 1.5 mL centrifuge tubes for a subsequent  
611 centrifugation. Cell lysates were then prepared by resuspending and sonicating cells for 5 s in  
612 cell lysis buffer containing 37.5 mM Tris, pH = 7.5, 1.5 mM EDTA, pH 8.0, 3% sodium dodecyl  
613 sulfate, 1.5% protease inhibitor cocktail (v/v), and 1.5 mM dithiothreitol (DTT). For receptor  
614 activity assays, in order to prevent carry-over of lysis buffer, cell lysates were concentrated in 3-

615 kDa molecular weight cut-off centrifugal filters and re-constituted back to initial volumes with  
616 serum-free media for a total of three repetitions. Proteins were then used for cross-linking  
617 analysis, deglycosylation and immunoblotting or used as ligands for functional receptor  
618 activation using the cAMP signalling biosensor assays.

619         Dissuccinimidyl suberate (DSS), a chemical cross-linker that is primarily reactive  
620 towards amino groups providing stabilization of weak or transient protein intermolecular  
621 interactions, was employed to study GPA2 and GPB5 protein-protein interactions. *A. aegypti* and  
622 *H. sapiens* GPA2-FLAG and GPB5-His proteins were separately, or combined together (GPA2-  
623 FLAG/GPB5-His) and then treated with DSS (Sigma Aldrich, Oakville, ON). In some  
624 experiments, *A. aegypti* GPA2-His/GPB5-His were co-expressed using a dual promoter plasmid  
625 and as such, media containing both His-tagged subunits were directly treated with DSS. To treat  
626 secreted concentrates of culture media containing *H. sapiens* GPA2 and GPB5 proteins, 0.68 mM  
627 DSS was used whereas both 0.68 mM (data not shown) and 2.04 mM DSS was used to test the  
628 dimerization characteristics of *A. aegypti* GPA2-His/GPB5-FLAG proteins. Cross-linking was  
629 performed for 30 min at RT and reactions were quenched with 50 mM Tris, pH 7.4 for 10 min  
630 under constant mixing. To remove N-linked sugars, protein samples were treated with peptide-N-  
631 Glycosidase F (PNGase) (New England Biolabs, Whitby, ON) following manufacturers  
632 guidelines, with the only modification being that protein samples were not heated to 100°C  
633 before enzymatic deglycosylation. Experiments aimed to determine the effects of protein  
634 glycosylation on cross-linking ability first treated *A. aegypti* GPA2-His/ GPB5-His subunits with  
635 PNGase and subsequently cross-linked samples with DSS after deglycosylation .

636

637 **Western blot analysis**

638 Samples were prepared in 2x Laemmli buffer (Sigma Aldrich, Oakville, ON) containing  
639 4% SDS, 20% glycerol, 10% 2-mercaptoethanol, 0.004% bromophenol blue and 0.125 M Tris  
640 HCl, pH ~6.8, and resolved on 10% or 15% SDS-polyacrylamide gels under reducing conditions  
641 at 120 V for 90-110 min. Using a wet transfer system, proteins were then transferred to  
642 polyvinylidene difluoride (PVDF) membranes at 100 V for 75 min. For GPA2-FLAG/GPB5-His  
643 heterodimerization experiments, samples were run in duplicate on the same gel and following  
644 transfer, membranes were cut in half for separate primary antibody incubations. Membrane blots  
645 containing protein samples were blocked for 1 h in PBS containing 0.1% Tween-20 (Bioshop,  
646 Burlington, ON, Canada) and 5% skim milk powder (PBSTB) rocking at RT. After blocking,  
647 membranes were incubated overnight at 4°C on a rocking platform in PBSTB containing mouse  
648 monoclonal anti-His (1:500 dilution) or mouse monoclonal anti-FLAG (1:500) primary antibody  
649 solutions. The next day, membranes were washed three times with PBS containing 0.1% Tween-  
650 20 (PBST) for 15 min each wash and then were incubated in PBSTB containing anti-mouse HRP  
651 conjugated secondary antibody (1:2000 – 1:3000 dilution) for 1 h rocking at RT before washing  
652 again with PBST (3 x 15 min washes). Finally, blots were incubated with Clarity Western ECL  
653 substrate and images were developed using a ChemiDoc MP Imaging System (Bio-Rad  
654 Laboratories, Mississauga, ON) and molecular weight measurements and analysis were  
655 performed using Image Lab 5.0 software (Bio-Rad Laboratories, Mississauga, ON).

656

657 **Receptor Functional Activation Bioluminescence Assays**

658 HEK 293T cells were co-transfected to express (i) *H. sapiens* TSHR, *A. aegypti* LGR1, or  
659 mCherry along with (ii) pGlosensor<sup>TM</sup>-22F cAMP biosensor plasmid (Promega Corp., Madison,  
660 WI), which encodes a modified form of firefly luciferase with a fused cAMP binding moiety  
661 providing a biosensor for the direct detection of cAMP signalling in live cells. At 48 h post  
662 transfection, recombinant cells were dislodged with PBS-EDTA, pelleted at 400xg for 5 min,  
663 resuspended in assay media (DMEM:F12 media with 10% fetal bovine serum (v/v)) containing  
664 cAMP GloSensor reagent (2% v/v), and incubated for 3 h rocking at RT shielded from light.  
665 White 96-well luminescence plates (Greiner Bio-One, Germany) were loaded under low light  
666 with previously prepared secreted or cell lysate protein concentrates (described above), forskolin  
667 or assay media alone, and incubated at 37°C for 30 min prior to performing receptor activity  
668 assays. For stimulatory G-protein (Gs) pathway detection, recombinant cells expressing either *H.*  
669 *sapiens* TSHR, *A. aegypti* LGR1, or mCherry along with the cAMP biosensor were pre-treated  
670 with 0.25 mM 3-isobutyl-1-methylxanthine (IBMX) for 30 min at RT with rocking and shielded  
671 from light. Using an automatic injector unit (BioTek Instruments Inc., Winooski VT),  
672 recombinant cells were then loaded into wells containing various treatments, including 250 nM  
673 forskolin as a positive control or concentrates of protein fractions from mCherry-transfected cells  
674 as a negative control. For inhibitory G-protein (Gi/o) pathway testing, *A. aegypti* GPA2 and/or  
675 GPB5 was tested for the ability to inhibit a forskolin-induced cAMP-mediated bioluminescent  
676 response. Using an automatic injector unit (BioTek Instruments Inc., Winooski VT), cells  
677 expressing LGR1 or mCherry (LGR1 activation and signalling negative control) were loaded  
678 into wells that contained various ligand treatments. Subsequently, 250 nM or 1 µM forskolin was  
679 added to wells immediately after the addition of recombinant cells, using a second automatic



680 injector unit. For bioluminescent assays with tethered GPA2/GPB5 proteins, after the 3 h  
681 incubation, recombinant cells expressing or not expressing LGR1 were equally divided to test Gs  
682 and Gi signalling pathways simultaneously using the same batch of cells per biological replicate.  
683 In all assays, luminescence was measured every 2 min for 20 min at 37°C using a Synergy 2  
684 Multimode Microplate Reader (BioTek, Winooski, VT) and averaged over 4-8 technical  
685 replicates for each treatment. To calculate the relative luminescent response, data was  
686 normalized to luminescent values recorded from negative control ligand treatments involving  
687 protein secretions derived from mCherry-transfected cells. Assays were performed repeatedly  
688 and involved 3-6 independent biological replicates.

689

690 **Figure Legends**

691

692 **Fig. 1.** GPA2/GPB5 subunit transcript expression and localization in adult *A. aegypti*. (a, b) RT-  
693 qPCR examining GPA2 (a) and GPB5 (b) transcript expression in the central nervous system of  
694 adult mosquitoes, with significant enrichment in the abdominal ganglia (AG). Subunit transcript  
695 abundance is shown relative to their expression in the thoracic ganglia (TG). Mean  $\pm$  SEM of  
696 three biological replicates. Columns denoted with different letters are significantly different from  
697 one another. Multiple comparisons two-way ANOVA test with Tukey's multiple comparisons  
698 ( $P < 0.05$ ) to determine sex- and tissue-specific differences. Fluorescence *in situ* hybridization  
699 anti-sense (c, d, g-j) and sense (e, f) probes to determine GPA2 and GPB5 transcript localization  
700 (GPA2 and/or GPB5 transcript, red; nuclei, blue). Unlike sense probe controls (e, f), two  
701 bilateral pairs of cells (arrowheads) were detected with GPA2 (c, g) and GPB5 (d, h) anti-sense  
702 probes in the first five abdominal ganglia. Co-localization of the GPA2 (g) and GPB5 (h)  
703 transcript was verified by treating abdominal ganglia dually with a combination of GPA2 and  
704 GPB5 anti-sense probe (i, j) that revealed two, intensely-stained bilateral pairs of cells. In (c-f)  
705 and (i-j), microscope settings were kept identical when acquiring images of control and  
706 experimental ganglia. Scale bars are 50  $\mu\text{m}$  in (c-f), (i-j) and 40  $\mu\text{m}$  in (g) and (h).

707

708 **Fig. 2.** Immunolocalization of GPB5 subunit expression in the abdominal ganglia of adult *A.*  
709 *aegypti*. Experimental treatments demonstrated GPB5 immunoreactivity (green) in two (a), and  
710 in some mosquitoes, three (b) bilateral pairs of neuroendocrine cells (arrowheads) within the first  
711 five abdominal ganglia of the ventral nerve cord (DAPI, blue). Optical sections of ganglia

712 revealed axonal projections emanate from GPB5-immunoreactive cells through the lateral nerves  
713 (arrows). No cells were detected in the sixth, terminal ganglion (c) and in control treatments  
714 (CON) where GPB5 antibody was preabsorbed with GPB5 synthetic antigen (d). In (a, d) or (b-  
715 c), microscope settings were kept identical when acquiring images of control and experimental  
716 ganglia. Scale bars are 25  $\mu\text{m}$  in (a-d) and 20  $\mu\text{m}$  in (b-c).

717

718 **Fig. 3.** Western blot analyses to determine the effects of glycosylation on homo- and heterodimer  
719 formation on the glycoprotein hormone (GPA2/GPB5) subunits in the mosquito, *A. aegypti*. (a)  
720 In untreated conditions, western blot analysis of GPA2 subunit alone reveals two bands at 16 and  
721 13 kDa. Whereas following treatment with PNGase, the higher molecular weight band  
722 disappears and the 13 kDa band is intensified. A thick, additional band at ~32 kDa appears when  
723 GPA2 protein is cross-linked with DSS, and this band migrates slightly lower to ~30 kDa when  
724 GPA2 protein is treated with both DSS and PNGase. (b) A 24 kDa band is observed in lanes  
725 loaded with untreated GPB5 subunit alone. Upon PNGase treatment, the 24 kDa band is not  
726 affected; however, upon treatment with DSS, a second faint band appears at 48 kDa that is not  
727 affected by deglycosylation. (c) Western blot analyses of co-expressed GPA2 and GPB5 subunits  
728 shows three distinct band sizes at 24 kDa, 16 kDa and 13 kDa, corresponding to the GPB5  
729 subunit and two forms of GPA2 subunit protein. Similar to (a), after treatment with PNGase, the  
730 higher molecular weight form of GPA2 is eliminated and the 13 kDa band intensifies. When  
731 GPA2/GPB5 protein is cross-linked, two additional bands are detected at ~48 kDa and ~ 32 kDa;  
732 however, following cross-linking and PNGase treatment, the ~32 kDa band is eliminated leaving  
733 only the 30 kDa band along with the unaffected ~48 kDa band.

734

735 **Fig. 4.** Elucidating heterodimerization of *H. sapiens* (human) (a) and *A. aegypti* (mosquito) (b)  
736 GPA2 and GPB5 subunits. Single promoter expression constructs for human and mosquito  
737 GPA2-FLAG and GPB5-His were used for transient expression in HEK 293T cells. Protein was  
738 harvested and subsequently concentrated, treated with DSS cross-linker, and probed with an anti-  
739 His or an anti-FLAG antibody after SDS-PAGE. (a, b) No bands were detected in lanes loaded  
740 with cross-linked GPA2-FLAG protein (Lane 1) or cross-linked GPB5-His protein (Lane 6),  
741 probed with an anti-His antibody or anti-FLAG antibody, respectively. (a) Bands corresponding  
742 to the monomeric form (18 kDa) and homodimer (36 kDa) of cross-linked human GPB5-His  
743 (Lane 3) and to the monomeric form (20 kDa) and homodimer (40 kDa) of cross-linked human  
744 GPA2-FLAG protein (Lane 4). A combination of the subunits with subsequent cross-linking of  
745 separately-produced human GPA2-FLAG and GPB5-His protein (Lane 2, 5) revealed a band size  
746 correlating to the human GPA2/ GPB5 heterodimer (38 kDa), detected using an anti-His (Lane  
747 2) or anti-FLAG (Lane 5) antibody. (b) Bands corresponding to the mosquito GPB5 monomer  
748 (24 kDa) (Lane 3), mosquito GPA2 glycosylated monomer (16 kDa) and homodimer pairs (30  
749 kDa and 32 kDa) (Lane 4). No detection of bands correlating to mosquito GPA2/GPB5  
750 heterodimer (37-40 kDa) were observed, when probed with either anti-His (Lane 2) or anti-  
751 FLAG (Lane 5) antibodies.

752

753 **Fig. 5.** cAMP-mediated bioluminescence assays to determine the effect of GPA2, GPB5 and  
754 GPA2/ GPB5 on G-protein signalling of *H. sapiens* (human) TSHR (a), *A. aegypti* (mosquito)  
755 LGR1 (b, c), or cells expressing a red fluorescent protein, mCherry (d). Secreted protein

756 fractions for each subunit were prepared separately from HEK 293T cells expressing human  
757 GPA2 (hA2), human GPB5 (hB5), mosquito GPA2 (A2), mosquito GPB5 (B5), mCherry, or co-  
758 expressing mosquito GPA2 and GPB5 in a dual promoter plasmid (A2/B5 coexp). Secreted  
759 protein fractions were then tested separately or combined (A2 + B5) and then incubated with  
760 cells co-expressing the cAMP biosensor along with either (a) human TSHR, (b, c) mosquito  
761 LGR1 or (d) mCherry, the latter of which was used as a negative control in the functional assay  
762 and also served to verify transfection efficiency of HEK 293T cells. Luminescent values were  
763 recorded and normalized to incubations with protein secretions collected from the media of  
764 mCherry-transfected cells. Forskolin (FSK, 250 nM) was used as a positive control for  
765 stimulatory G-protein (Gs) pathway (a, b) and inhibitory G-protein (Gi/o) pathway testing (c, d).  
766 (a) Unlike treatments with human GPA2 (hA2) or human GPB5 (hB5) applied singly, a  
767 significant increase in cAMP-mediated luminescence was observed when TSHR-expressing cells  
768 were incubated with culture media containing both human GPA2 and human GPB5 (hA2 +  
769 hB5), relative to incubations with mCherry controls. (b) No differences in luminescence were  
770 observed when LGR1-expressing cells were incubated with media containing mosquito  
771 GPA2/GPB5 subunits, compared to mCherry controls. (c) The addition of GPA2 and GPB5 on  
772 LGR1-expressing cells significantly inhibited FSK-induced luminescent response, compared to  
773 treatments with mCherry controls; (d) however, this inhibition was also observed when GPA2  
774 and GPB5 proteins were incubated with HEK 293T cells in the absence of LGR1. Mean  $\pm$  SEM  
775 of three (a, b, d) or six (c) biological replicates. Columns denoted with different letters are  
776 significantly different from one another. Multiple comparisons one-way ANOVA test with  
777 Tukey's multiple comparisons ( $P < 0.05$ ).

778

779 **Fig. 6.** Western blot analysis and verification of *A. aegypti* GPA2/GPB5 tethered protein  
780 expressed in HEK 293T cells. (a) Western blot analysis of secreted or cell lysate protein fractions  
781 of HEK 293T expressing tethered GPA2/GPB5 (tA2/B5) or red fluorescent protein (mCherry) as  
782 a control. Tethered GPA2/GPB5 is represented as a strong 32-40 kDa band in cell lysate  
783 fractions, and as two less intense 37 kDa and 40 kDa bands in secreted fractions; however, no  
784 bands were detected in lanes loaded with proteins from mCherry transfected cells. (b) Upon  
785 treatment of tethered GPA2/GPB5 secreted protein fractions with PNGase, the 40 kDa band is  
786 eliminated and the 37 kDa band intensifies, indicating removal of N-linked oligosaccharides.

787

788 **Fig. 7.** cAMP-mediated bioluminescence assay determining the effects of tethered GPA2/GPB5  
789 on receptor activation and G protein signalling of LGR1. Secreted protein fractions (a, c) and cell  
790 lysates (b, d) derived from cells transiently expressing tethered GPA2/GPB5 (tA2/B5) or red  
791 fluorescent protein (mCherry) were tested for their ability to stimulate (Gs signalling) (a, b) or  
792 inhibit 1  $\mu$ M forskolin-induced (Gi/o signalling) (c, d) cAMP-mediated luminescence. (a-d)  
793 Luminescence response was recorded and normalized to treatments involving mCherry proteins  
794 with LGR1-expressing HEK 293T cells. In all treatments, the relative luminescence response  
795 was greater in LGR1-expressing cells (+ LGR1) compared to cells not expressing LGR1 (-  
796 LGR1). (a, b) Applications of 1  $\mu$ M forskolin (FSK) to recombinant cells expressing and not  
797 expressing LGR1 significantly increased cAMP-mediated luminescence relative to treatments  
798 with tA2/B5 or mCherry. However, incubation of LGR1-expressing cells with tA2/B5 secreted  
799 (a) or cell lysate (b) proteins, failed to increase cAMP-mediated luminescence above background

800 levels from incubations with mCherry proteins. (c, d) 1  $\mu$ M forskolin along with either mCherry  
801 proteins, tA2/B5 proteins or assay media (Assay) was added to cells in the presence or absence  
802 of LGR1 expression. The ability for each ligand treatment to reduce a forskolin-induced increase  
803 in cAMP luminescence was examined. (c) The tA2/B5 secreted protein samples incubated with  
804 LGR1-expressing cells did not significantly affect the forskolin-induced cAMP luminescence,  
805 compared to control treatments with secreted proteins from mCherry expressing cells. (d)  
806 Relative to incubations with mCherry cell lysate proteins, cell lysates containing tA2/B5 protein  
807 significantly inhibited forskolin-induced elevations of cAMP-mediated luminescence, and this  
808 inhibition was specific to LGR1-expressing cells. Mean  $\pm$  SEM of three biological replicates.  
809 Columns denoted with different letters are significantly different from one another. Multiple  
810 comparisons two-way ANOVA test with Tukey's multiple comparisons ( $P < 0.05$ ).

811 **References**

- 812
- 813 1. Pierce JG, Parsons TF. Glycoprotein hormones: structure and function. *Annu Rev*  
814 *Biochem.* 1981;50:465-495. doi:10.1146/annurev.bi.50.070181.002341
  - 815 2. Stockell HA, Renwick AGC. Molecular structures of glycoprotein hormones and  
816 functions of their carbohydrate components. *Biochem J.* 1992;287(3):665-679.  
817 doi:10.1042/bj2870665
  - 818 3. Nakabayashi K, Matsumi H, Bhalla A, et al. Thyrostimulin, a heterodimer of two new  
819 human glycoprotein hormone subunits, activates the thyroid-stimulating hormone  
820 receptor. *J Clin Invest.* 2002;109(11):1445-1452. doi:10.1172/JCI200214340
  - 821 4. Hsu SY. Evolution of Glycoprotein Hormone Subunit Genes in Bilateral Metazoa:  
822 Identification of Two Novel Human Glycoprotein Hormone Subunit Family Genes, GPA2  
823 and GPB5. *Mol Endocrinol.* 2002;16(7):1538-1551. doi:10.1210/me.16.7.1538
  - 824 5. Santos S, Mazan S, Venkatesh B, Cohen-Tannoudji J, Qu erat B. Emergence and evolution  
825 of the glycoprotein hormone and neurotrophin gene families in vertebrates. *BMC Evol*  
826 *Biol.* 2011;11(1):332. doi:10.1186/1471-2148-11-332
  - 827 6. Sun SC, Hsu PJ, Wu FJ, Li SH, Lu CH, Luo CW. Thyrostimulin, but not thyroid-  
828 stimulating hormone (TSH), acts as a paracrine regulator to activate the TSH receptor in  
829 mammalian ovary. *J Biol Chem.* 2010;285(6):3758-3765. doi:10.1074/jbc.M109.066266
  - 830 7. Okada SL, Ellsworth JL, Durnam DM, et al. A glycoprotein hormone expressed in  
831 corticotrophs exhibits unique binding properties on thyroid-stimulating hormone receptor.  
832 *Mol Endocrinol.* 2006;20(2):414-425. doi:10.1210/me.2005-0270
  - 833 8. Duncan Bassett JH, van der Spek A, Logan JG, et al. Thyrostimulin Regulates  
834 Osteoblastic Bone Formation During Early Skeletal Development. *Endocrinology.*  
835 2015;(August):en.2014-1943. doi:10.1210/en.2014-1943
  - 836 9. van Zeijl CJJ, Surovtseva O V, Kwakkel J, et al. Thyrostimulin deficiency does not alter  
837 peripheral responses to acute inflammation-induced nonthyroidal illness. *Am J Physiol*  
838 *Endocrinol Metab.* 2014;307(6):E527-37. doi:10.1152/ajpendo.00266.2014
  - 839 10. Suzuki C, Nagasaki H, Okajima Y, et al. Inflammatory cytokines regulate glycoprotein  
840 subunit beta5 of thyrostimulin through nuclear factor-kappaB. *Endocrinology.*  
841 2009;150(5):2237-2243. doi:10.1210/en.2008-0823
  - 842 11. Huang W, Li Z, Lin T, Wang S, Wu F, Luo C. Thyrostimulin-TSHR signaling promotes  
843 the proliferation of NIH : OVCAR-3 ovarian cancer cells via trans-regulation of the  
844 EGFR pathway. *Nat Publ Gr.* 2016;(June):1-13. doi:10.1038/srep27471
  - 845 12. Heyland A, Plachetzki D, Donnelly E, et al. Distinct expression patterns of glycoprotein  
846 hormone subunits in the lophotrochozoan *Aplysia*: Implications for the evolution of  
847 neuroendocrine systems in animals. *Endocrinology.* 2012;153(11):5440-5451.  
848 doi:10.1210/en.2012-1677
  - 849 13. Vandersmissen HP, Van Hiel MB, Van Loy T, Vleugels R, Vanden Broeck J. Silencing *D.*  
850 *melanogaster* *Igr1* impairs transition from larval to pupal stage. *Gen Comp Endocrinol.*  
851 2014;209:135-147. doi:10.1016/j.ygcen.2014.08.006
  - 852 14. Paluzzi JP, Vanderveken M, O'Donnell MJ. The heterodimeric glycoprotein hormone,  
853 GPA2/GPB5, regulates ion transport across the hindgut of the adult mosquito, *Aedes*  
854 *aegypti*. *PLoS One.* 2014;9(1):e86386. doi:10.1371/journal.pone.0086386



- 855 15. Rocco DA, Paluzzi J-PV. Functional role of the heterodimeric glycoprotein hormone,  
856 GPA2/GPB5, and its receptor, LGR1: An invertebrate perspective. *Gen Comp Endocrinol.*  
857 2016;234. doi:10.1016/j.ygcen.2015.12.011
- 858 16. Sellami A, Agricola HJ, Veenstra JA. Neuroendocrine cells in *Drosophila melanogaster*  
859 producing GPA2/GPB5, a hormone with homology to LH, FSH and TSH. *Gen Comp*  
860 *Endocrinol.* 2011;170(3):582-588. doi:10.1016/j.ygcen.2010.11.015
- 861 17. Jourjine N, Mullaney BC, Mann K, Scott K. Coupled Sensing of Hunger and Thirst  
862 Signals Balances Sugar and Water Consumption. *Cell.* 2016;166(4):855-866.  
863 doi:10.1016/j.cell.2016.06.046
- 864 18. Rocco DA, Kim DH, Paluzzi JV. Immunohistochemical mapping and transcript  
865 expression of the GPA2 / GPB5 receptor in tissues of the adult mosquito, *Aedes aegypti*.  
866 2017. doi:10.1007/s00441-017-2610-3
- 867 19. Rocco DA, Garcia ASG, Scudeler EL, Santos DC, Nóbrega RH, Paluzzi J V.  
868 Glycoprotein Hormone Receptor Knockdown Leads to Reduced Reproductive Success in  
869 Male *Aedes aegypti*. *Front Physiol.* 2019;10(March):1-11. doi:10.3389/fphys.2019.00266
- 870 20. Combarnous Y. Molecular basis of the specificity of binding of glycoprotein hormones to  
871 their receptors. *Endocr Rev.* 1992;13(4):670-691.
- 872 21. Xing Y, Myers R, Cao D, et al. Glycoprotein hormone assembly in the endoplasmic  
873 reticulum: II. Multiple roles of a redox sensitive (beta)-subunit disulfide switch. *J Biol*  
874 *Chem.* 2004;279(34):35437-35448.
- 875 22. Galet C, Lecompte F, Combarnous Y. Association/dissociation of gonadotropin subunits  
876 involves disulfide bridge disruption which is influenced by carbohydrate moiety. *Biochem*  
877 *Biophys Res Commun.* 2004;324(2):868-873.
- 878 23. Nagasaki H, Wang Z, Jackson VR, Lin S, Nothacker HP, Civelli O. Differential  
879 expression of the thyrostimulin subunits, glycoprotein  $\alpha 2$  and  $\beta 5$  in the rat pituitary. *J Mol*  
880 *Endocrinol.* 2006;37(1):39-50. doi:10.1677/jme.1.01932
- 881 24. Dos Santos S, Bardet C, Bertrand S, Escriva H, Habert D, Querat B. Distinct expression  
882 patterns of glycoprotein hormone-alpha2 and -beta5 in a basal chordate suggest  
883 independent developmental functions. *Endocrinology.* 2009;150(8):3815-3822.  
884 doi:10.1210/en.2008-1743
- 885 25. Tando Y, Kubokawa K. A homolog of the vertebrate thyrostimulin glycoprotein hormone  
886 alpha subunit (GPA2) is expressed in *Amphioxus* neurons. *Zoolog Sci.* 2009;26(6):409-  
887 414. doi:10.2108/zsj.26.409
- 888 26. Alvarez E, Cahoreau C, Combarnous Y. Comparative structure analyses of cystine knot-  
889 containing molecules with eight aminoacyl ring including glycoprotein hormones (GPH)  
890 alpha and beta subunits and GPH-related A2 (GPA2) and B5 (GPB5) molecules. *Reprod*  
891 *Biol Endocrinol.* 2009;7(1):90. doi:10.1186/1477-7827-7-90
- 892 27. Krause G, Kreuchwig A, Kleinau G. Extended and Structurally Supported Insights into  
893 Extracellular Hormone Binding, Signal Transduction and Organization of the Thyrotropin  
894 Receptor. *PLoS One.* 2012;7(12). doi:10.1371/journal.pone.0052920
- 895 28. Hauser F, Nothacker HP, Grimmlikhuijzen CJ. Molecular cloning, genomic organization,  
896 and developmental regulation of a novel receptor from *Drosophila melanogaster*  
897 structurally related to members of the thyroid-stimulating hormone, follicle-stimulating  
898 hormone, luteinizing hormone/choriogonadotropin. *J Biol Chem.* 1997;272(2):1002-1010.

- 899 doi:10.1074/jbc.272.2.1002
- 900 29. Sudo S, Kuwabara Y, Park J Il, Sheau YH, Hsueh AJW. Heterodimeric fly glycoprotein  
901 hormone- $\alpha$ 2 (GPA2) and glycoprotein hormone- $\beta$ 5 (GPB5) activate fly leucine-rich  
902 repeat-containing G protein-coupled receptor-1 (DLGR1) and stimulation of human  
903 thyrotropin receptors by chimeric fly GPA2 and human GPB5. *Endocrinology*.  
904 2005;146(8):3596-3604. doi:10.1210/en.2005-0317
- 905 30. Sgourakis NG, Bagos PG, Papasaikas PK, Hamodrakas SJ. A method for the prediction of  
906 GPCRs coupling specificity to G-proteins using refined profile Hidden Markov Models.  
907 2005;12:1-12. doi:10.1186/1471-2105-6-104
- 908 31. Brownstein M. The biochemistry of the polypeptide hormones. Wallis M, Howell S,  
909 Taylor K, eds. *Cell*. 1985;48(2):147-183.
- 910 32. Szkudlinski MW, Fremont V, Ronin C, et al. Thyroid-Stimulating Hormone and Thyroid-  
911 Stimulating Hormone Receptor Structure-Function Relationships. 2002:473-502.
- 912 33. Atwood B, Lopez J, Wager-Miller J, Mackie K, Straiker A. Expression of G protein-  
913 coupled receptors and related proteins in HEK293, AtT20, BV2, and N18 cell lines as  
914 revealed by microarray analysis. *BMC Genomics*. 2011. doi:10.1186/1471-2164-12-14
- 915 34. Priyanka V, Chichili R, Kumar V, Sivaraman J. Linkers in the structural biology of  
916 protein – protein interactions. 2013;22:153-167. doi:10.1002/pro.2206
- 917 35. Fares F, Suganuma N, Nishimori K, LaPolt P, Hsueh A, Boime I. Design of a long-acting  
918 follitropin agonist by fusing the C-terminal sequence of the chorionic gonadotropin  $\beta$   
919 subunit to the follitropin  $\beta$  subunit. *Proc Natl Acad Sci USA*. 1992;89:4304-4308.
- 920 36. Joshi L, Murata Y, Wondisford F, Szkudlinski M, Desai R, Weintraub B. Recombinant  
921 thyrotropin containing a  $\beta$ -subunit chimera with the human chorionic gonadotropin- $\beta$   
922 carboxy terminal is biologically active with a prolonged plasma half-life: role of  
923 carbohydrate in bioactivity and metabolic clearance. *Endocrinology*. 1995;136:3839-3948.
- 924 37. Furuhashi M, Shikone T, Fares F, Sugahara T, Hsueh A, Boime I. Fusing the carboxy-  
925 terminal peptide of the chorionic gonadotropin (CG)  $\beta$ -subunit to the common  $\alpha$ -subunit:  
926 retention of O-linked glycosylation and enhanced in vivo bioactivity of chimeric human  
927 CG. *Mol Endocrinol*. 1995;9:54-63.
- 928 38. Sower SA, Decatur WA, Hausken KN, et al. Emergence of an Ancestral Glycoprotein  
929 Hormone in the Pituitary of the Sea Lamprey, a Basal Vertebrate. *Endocrinology*.  
930 2015;156:3026-3037. doi:10.1210/en.2014-1797
- 931 39. Azzam N, Bar-Shalom R, Fares F. Conversion of TSH Heterodimer to a Single  
932 Polypeptide Chain Increases Bioactivity and Longevity. *Endocrinology*. 2012;153(2):954-  
933 960. doi:10.1210/en.2011-1856
- 934 40. Cetani F, Tonacchera M, Vassart G. Differential effects of NaCl concentration on the  
935 constitutive activity of the thyrotropin and the luteinizing hormone/chorionic  
936 gonadotropin receptors. *FEBS Lett*. 1996;378:27-31.
- 937 41. Herrlich A, Kuhn B, Grosse R, Schmid A, Schultz G, Gudermann T. Involvement of Gs  
938 and Gi Proteins in Dual Coupling of the Luteinizing Hormone Receptor to Adenylyl  
939 Cyclase and Phospholipase C. *J Biol Chem*. 1996;271(28):16764-16772.
- 940 42. Grasberger H, Van Sande J, Hag-Dahood M, Tenenbaum-Rakover Y, S R. A familial  
941 thyrotropin (TSH) receptor mutation provides *in vivo* evidence that the inositol  
942 phosphates/Ca<sup>2+</sup> cascade mediates TSH action on thyroid hormone synthesis. *J Clin*

- 943 *Endocrinol Metab.* 2007;92:2816-2820.
- 944 43. Kleinau G, Jaeschke H, Worth C, et al. Principles and Determinants of G-Protein  
945 Coupling by the Rhodopsin-Like Thyrotropin Receptor. *PLoS One.* 2010;5(3):e9745.  
946 doi:doi.org/10.1371/journal.pone.0009745
- 947 44. Strickland TW, Puett D. The kinetic and equilibrium parameters of subunit association  
948 and gonadotropin dissociation. *J Biol Chem.* 1982;257(6):2954-2960.
- 949 45. Ingham K, Weintraub B, Edelhock H. Kinetics of recombination of the subunits of human  
950 chorionic gonadotropin. Effect of subunit concentration. *Biochemistry.* 1976;15(8):1720-  
951 1726.
- 952 46. Luo C-W, Dewey EM, Sudo S, et al. Bursicon, the insect cuticle-hardening hormone, is a  
953 heterodimeric cystine knot protein that activates G protein-coupled receptor LGR2. *Proc*  
954 *Natl Acad Sci U S A.* 2005;102(8):2820-2825. doi:10.1073/pnas.0409916102
- 955 47. An S, Dong S, Wang Q, et al. Insect neuropeptide bursicon homodimers induce innate  
956 immune and stress genes during molting by activating the NF- $\kappa$ B transcription factor  
957 relish. *PLoS One.* 2012;7(3):1-9. doi:10.1371/journal.pone.0034510
- 958 48. Zhang H, Dong S, Xi C, Stanley D, Beerntsen B. Relish2 mediates bursicon homodimer-  
959 induced prophylactic immunity in the mosquito *Aedes aegypti*. 2017;(January):1-9.  
960 doi:10.1038/srep43163
- 961 49. Tando Y, Kubokawa K. Expression of the gene for ancestral glycoprotein hormone  $\beta$   
962 subunit in the nerve cord of amphioxus. *Gen Comp Endocrinol.* 2009;162(3):329-339.  
963 doi:10.1016/j.ygcen.2009.04.015
- 964 50. Trudeau VL. Really old hormones up to new tricks: glycoprotein hormone subunits may  
965 have roles in development. *Endocrinology.* 2009;150(8):3446-3447. doi:10.1210/en.2009-  
966 0465
- 967 51. Gondalia K, Qudrat A, Bruno B, Fleites Medina J, Paluzzi JP V. Identification and  
968 functional characterization of a pyrokinin neuropeptide receptor in the Lyme disease  
969 vector, *Ixodes scapularis*. *Peptides.* 2016;86:42-54. doi:10.1016/j.peptides.2016.09.011  
970  
971

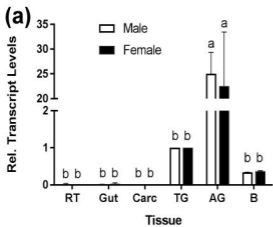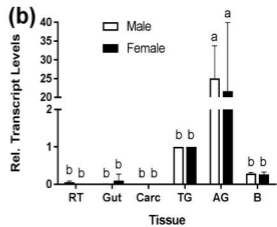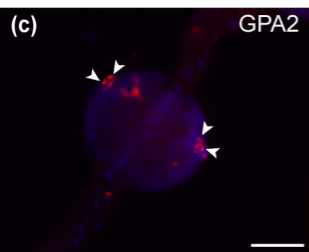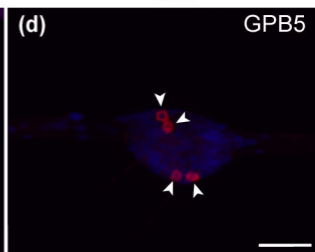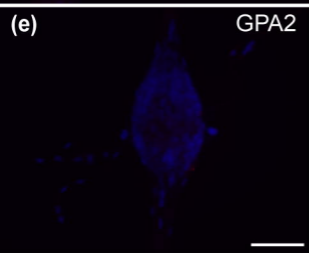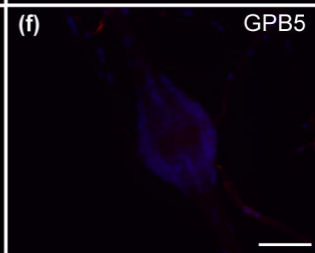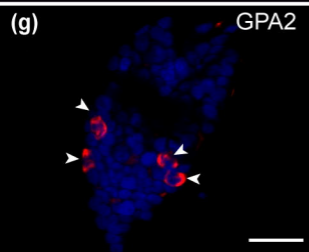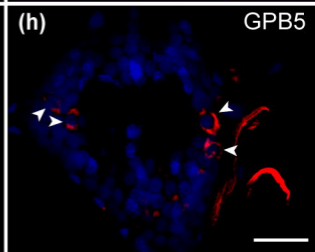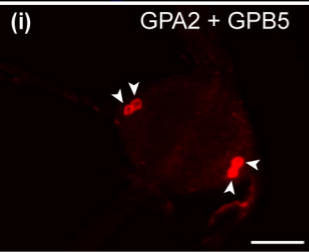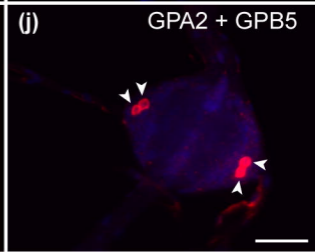

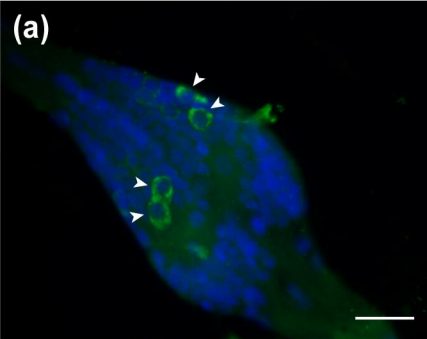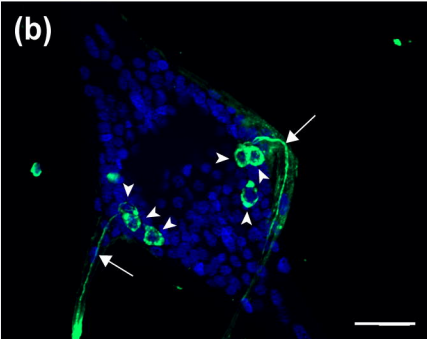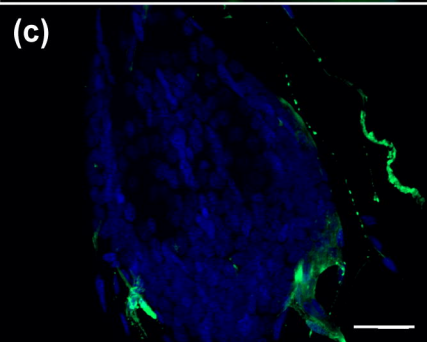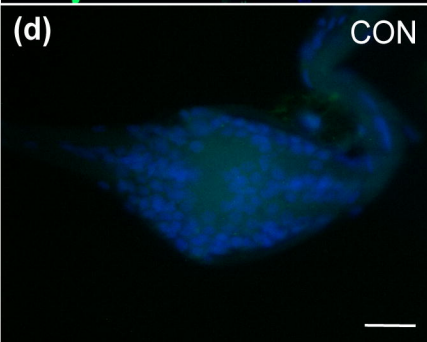

**(a)**

Lane: 1 2 3 4 kDa

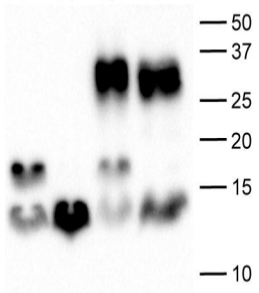

PNGase: - + - +  
 DSS: - - + +

**(b)**

Lane: 1 2 3 4 kDa

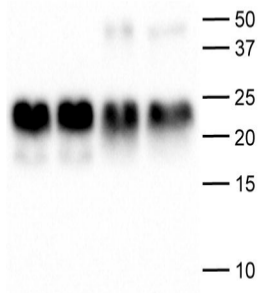

PNGase: - + - +  
 DSS: - - + +

**(c)**

Lane: 1 2 3 4 kDa

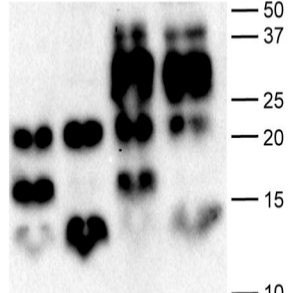

PNGase: - + - +  
 DSS: - - + +

**(a)**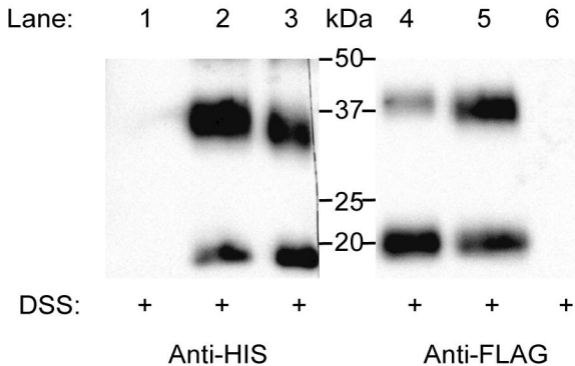**(b)**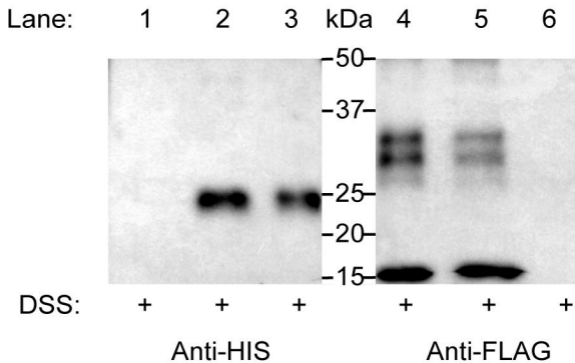

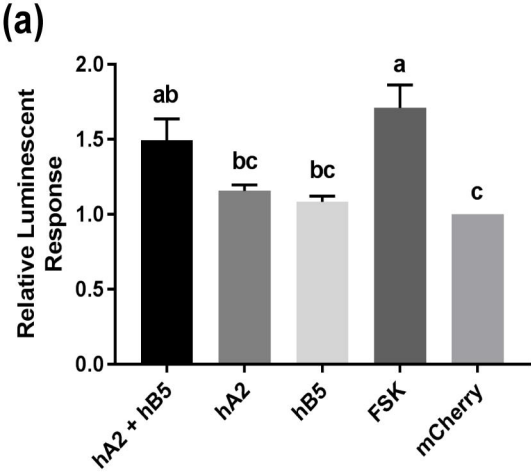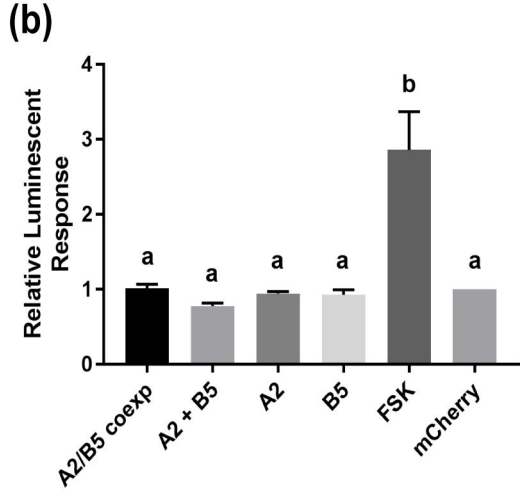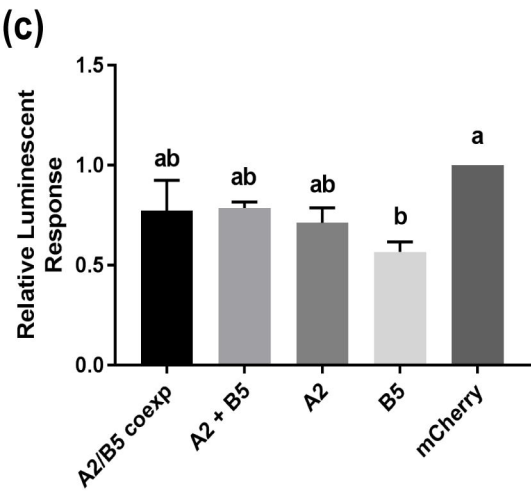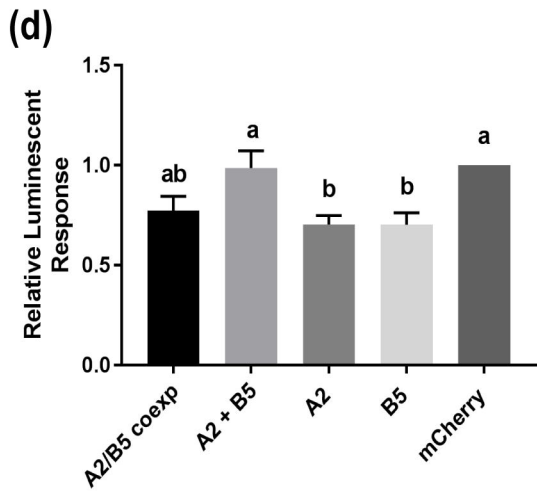



**(a)**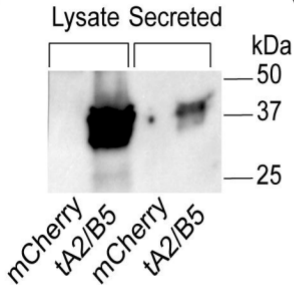**(b)**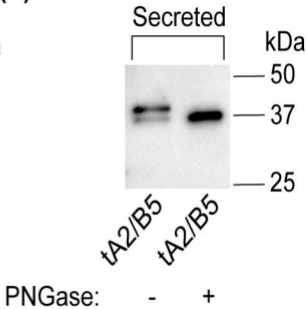

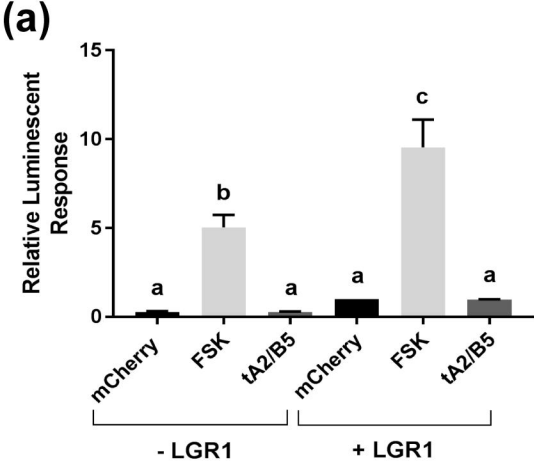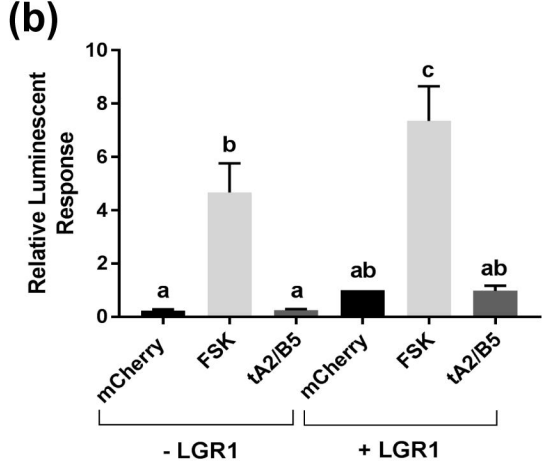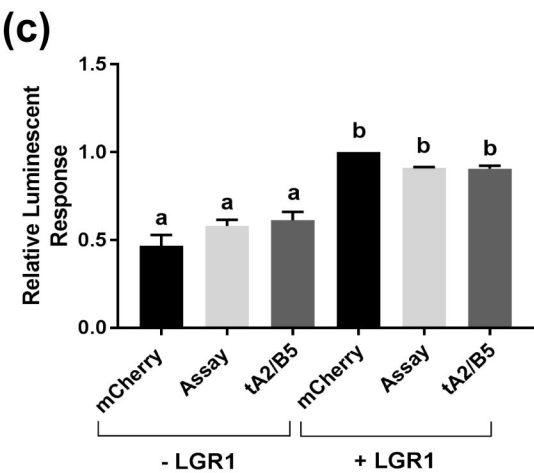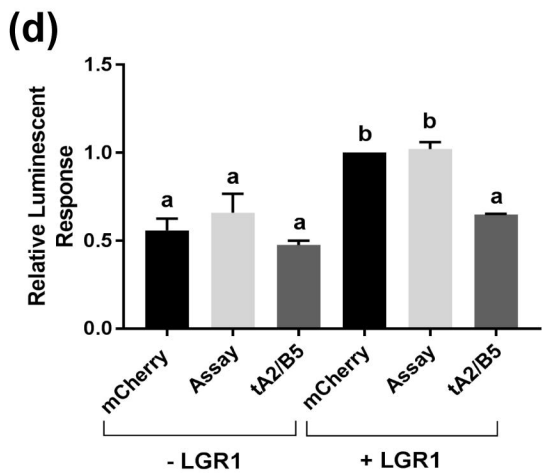

Source: https://www.biorxiv.org/content/10.1101/694653v2.full.pdf
